# Supplementary material for: Self-decorated Cu2−xSe nanosheets as anode materials for Li ion batteries and electrochemical hydrogen storage
Source: Royal Society of Chemistry journal article supplement (doi:10.1039/c3ce42308e), 2014-01-01
Supplement: c3ce42308e.pdf [file c3ce42308e.pdf]

## Supplementary Information

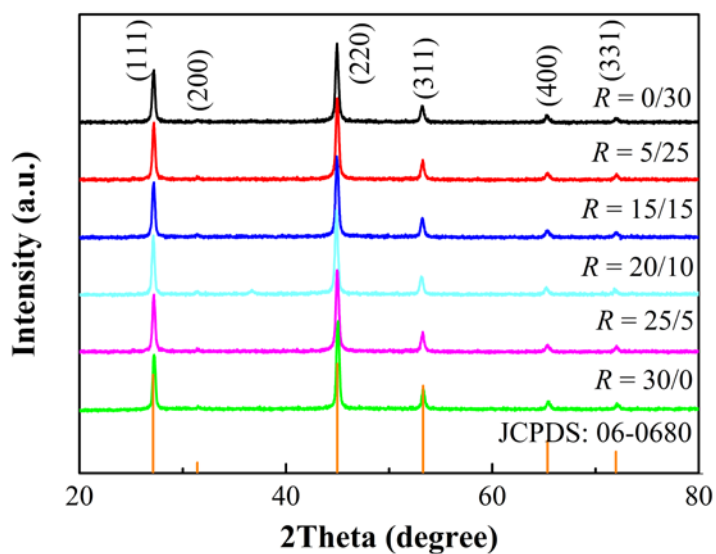

Fig. S1 XRD patterns of Cu<sub>2-x</sub>Se nanosheets synthesized through a solvothermal process in a different volume ratio of ethylene glycol/water (*R*), (a) *R* = 0/30, (b) *R* = 5/25, (c) *R* = 15/15, (d) *R* = 20/10, (e) *R* = 25/5, (f) *R* = 30/0

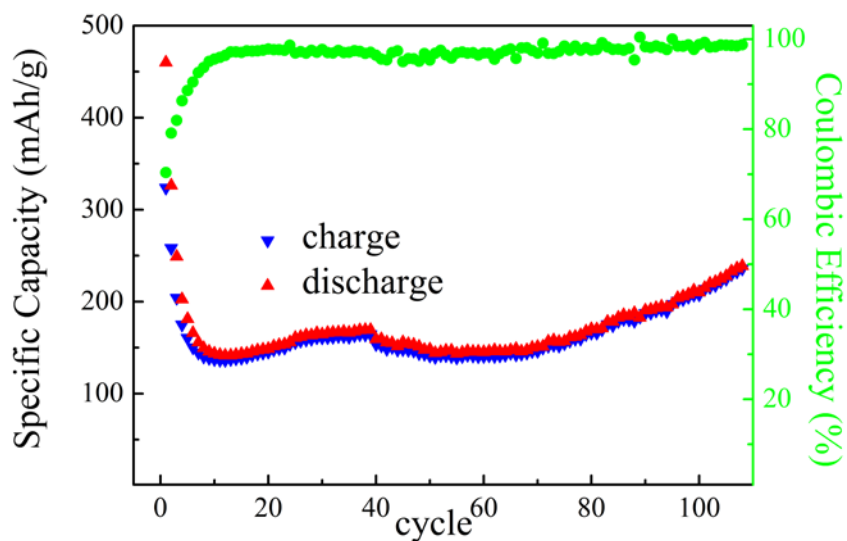

Fig. S2 Charge-discharge capacity, and Coulombic efficiency of Cu<sub>2-x</sub>Se nanosheets at a current density of 50 mA g<sup>-1</sup> with a voltage window of 0.01 V-3 V.

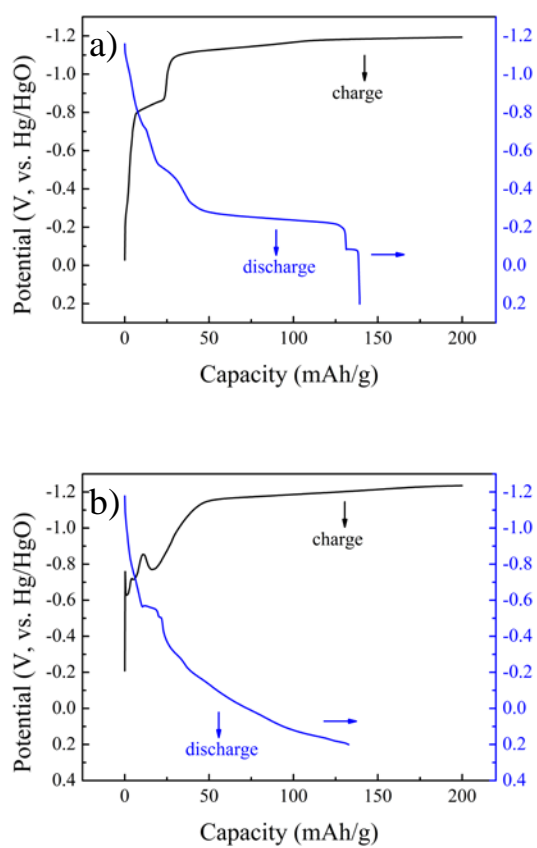

Fig. S3 charge–discharge curve of Cu<sub>2-x</sub>Se nanosheets measured at a current density of (a) 100 mA g<sup>-1</sup>, (b) 200 mA g<sup>-1</sup>.
